# Supplementary material for: Collation Efficiency of Poly(Vinyl Alcohol) and Alginate Membranes with Iron-Based Magnetic Organic/Inorganic Fillers in Pervaporative Dehydration of Ethanol
Source: PubMed Central journal article supplement (PMC7560291; doi:10.3390/ma13184152), 2020-09-18
Supplement: materials-13-04152-s001.pdf [file materials-13-04152-s001.pdf]

# Collation Efficiency of Poly(Vinyl Alcohol) and Alginate Membranes with Iron-Based Magnetic Organic/Inorganic Fillers in Pervaporative Dehydration of Ethanol

Gabriela Dudek <sup>1,\*</sup>, Roman Turczyn <sup>1</sup> and David Djurado <sup>2</sup>

<sup>1</sup> Department of Physical Chemistry and Technology of Polymers, Faculty of Chemistry, Silesian University of Technology, Strzody 9, 44-100 Gliwice, Poland; roman.turczyn@polsl.pl

<sup>2</sup> Systèmes Moléculaires et nanoMatériaux pour l'Énergie et la Santé (SyMMES), IRIG, CNRS, CEA Grenoble, Université Grenoble Alpes, 17 rue des Martyrs, 38054 Grenoble, France; david.djurado@cea.fr

\* Correspondence: gmdudek@polsl.pl

Received: 18 August 2020; Accepted: 15 September 2020; Published: date

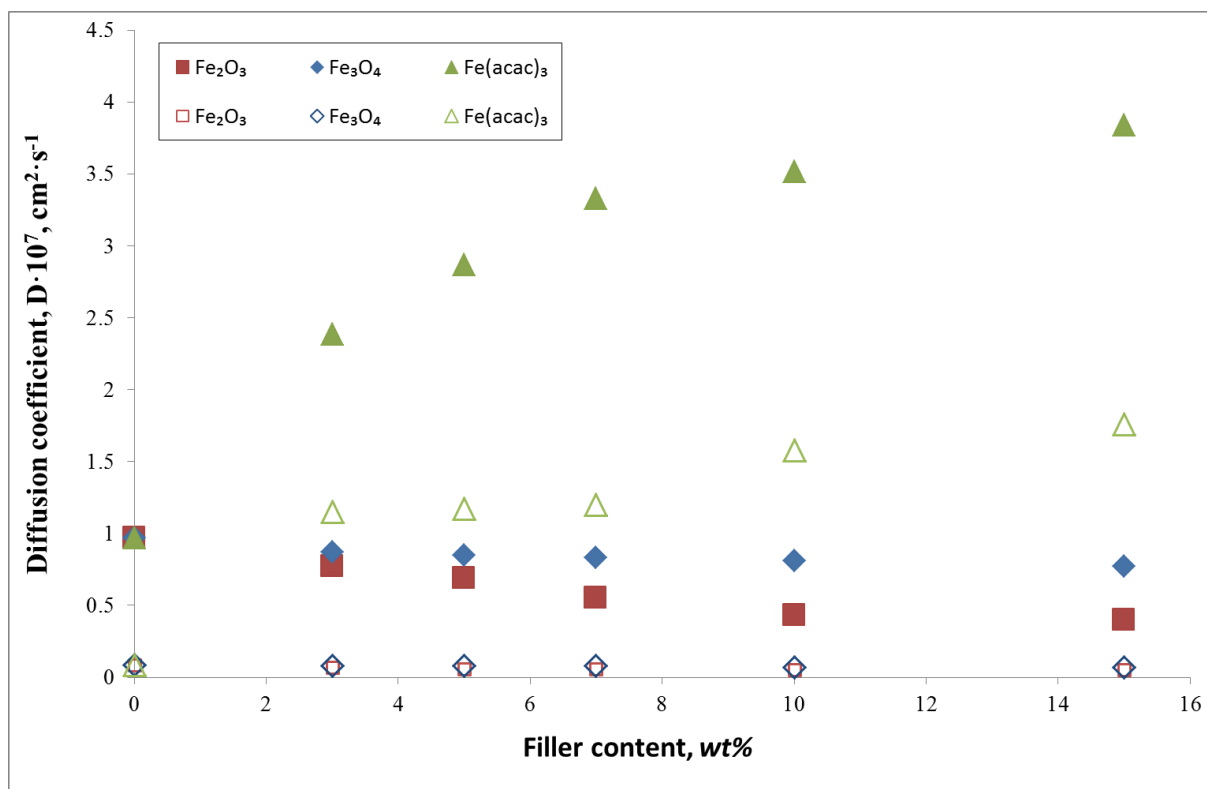

**Figure S1.** The variation of water (full symbols) and ethanol (blank symbols) diffusion coefficients with increasing content of hematite, magnetite and iron(III) acetylacetonate fillers in ALG membranes.

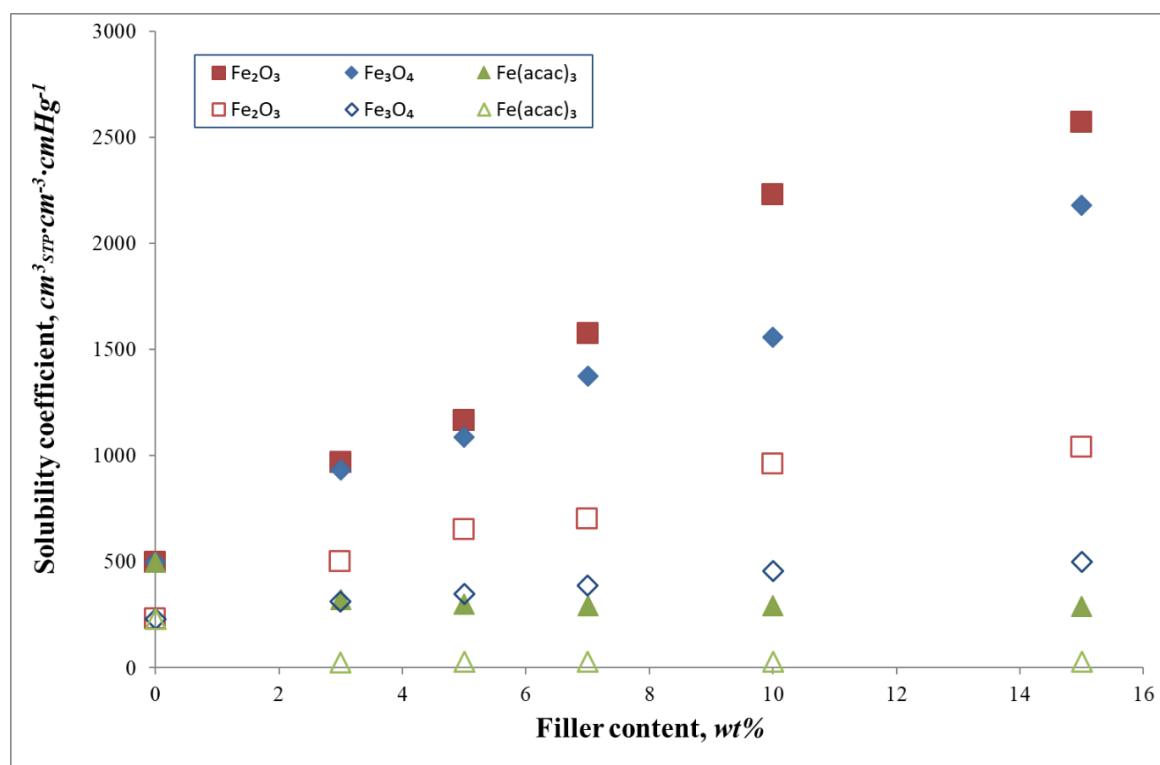

**Figure S2.** The variation of water (full symbols) and ethanol (blank symbols) solubility coefficients with increasing content of hematite, magnetite and iron(III) acetylacetonate fillers in ALG membranes.

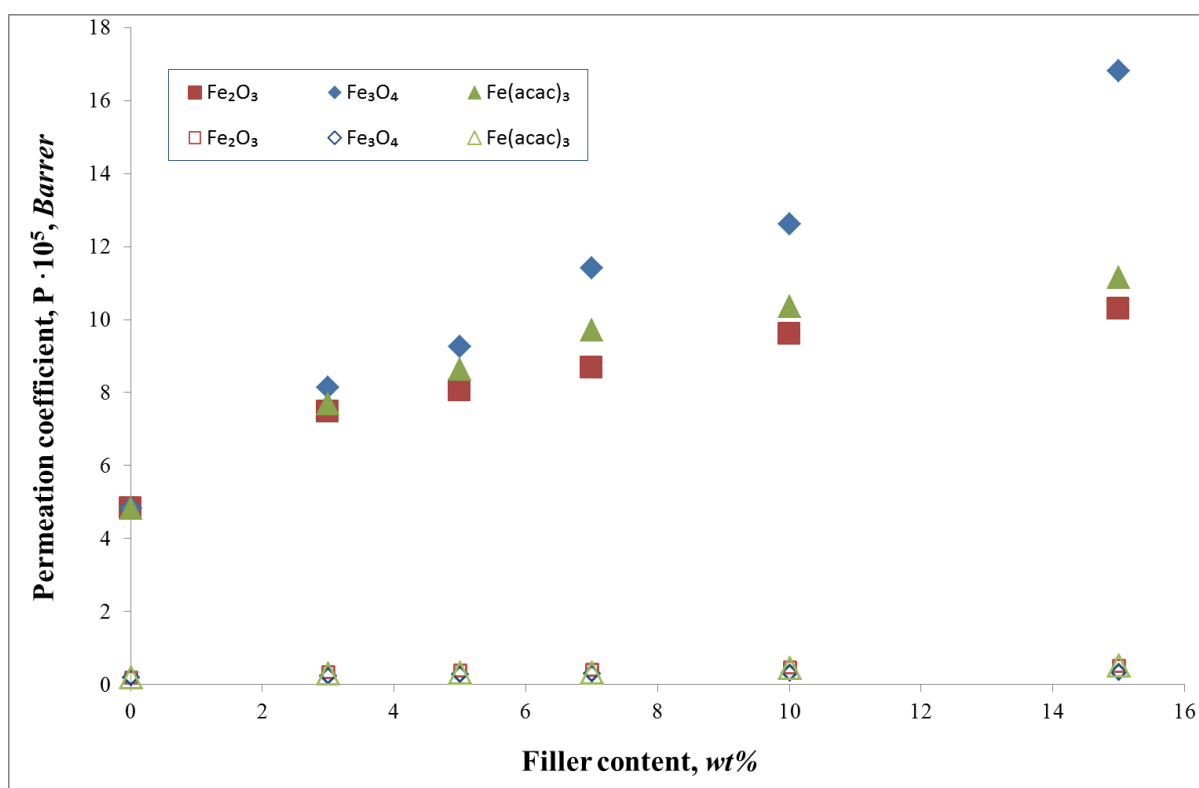

**Figure S3.** The variation of water (full symbols) and ethanol (blank symbols) permeation coefficients with increasing content of hematite, magnetite and iron(III) acetylacetonate fillers in ALG membranes.

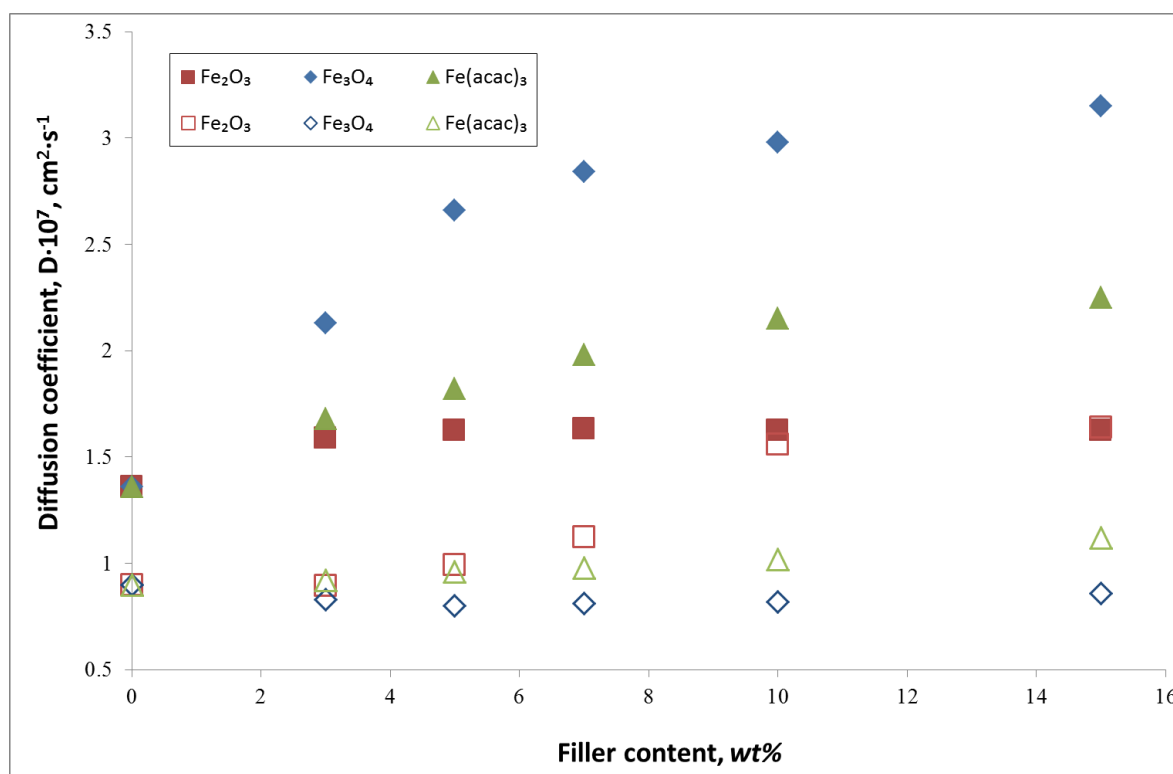

**Figure S4.** The variation of water (full symbols) and ethanol (blank symbols) diffusion coefficients with increasing content of hematite, magnetite and iron(III) acetylacetonate fillers in PVA membranes.

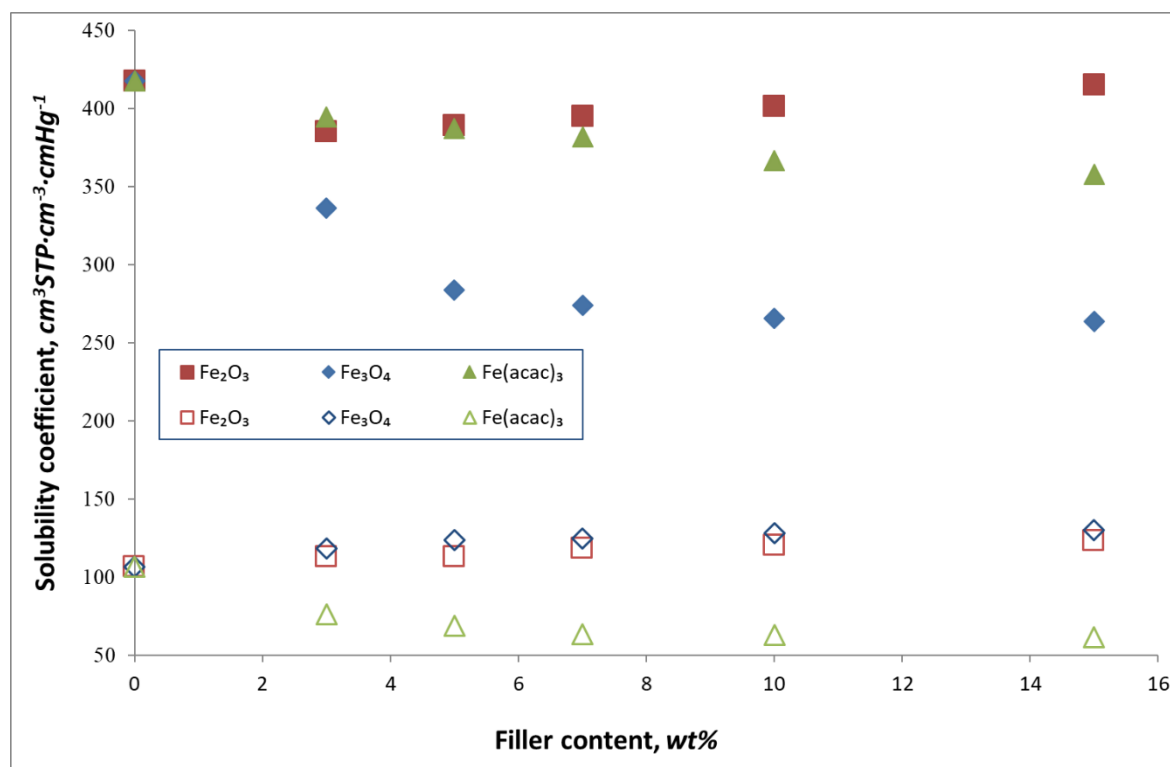

**Figure S5.** The variation of water (full symbols) and ethanol (blank symbols) solubility coefficients with increasing content of hematite, magnetite and iron(III) acetylacetonate fillers in PVA membranes.

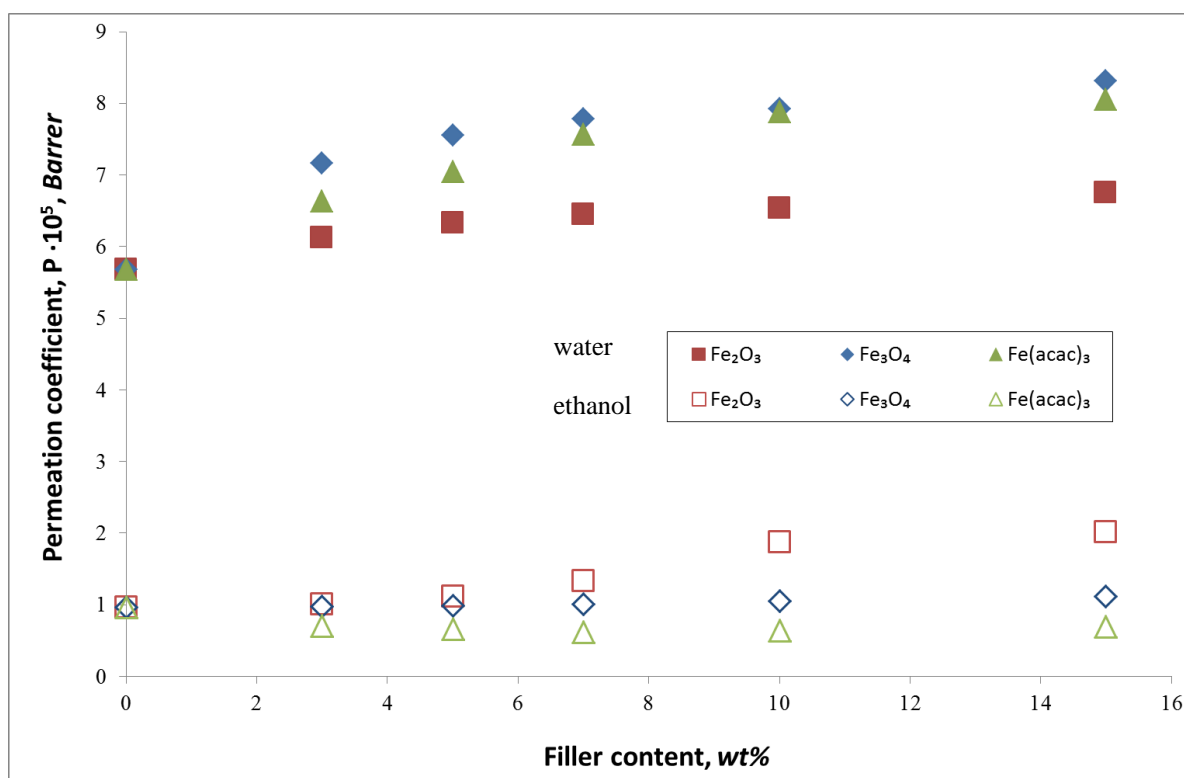

**Figure S6.** The variation of water (full symbols) and ethanol (blank symbols) permeation coefficients with increasing content of hematite, magnetite and iron(III) acetylacetonate fillers in PVA membranes.
